# Supplementary material for: Why and How We Should Join the Shift From Significance Testing to Estimation
Source: Preprints.org preprint supplement (doi:10.20944/preprints202112.0235.v2), 2022-03-23
Supplement: Supplementary file 3 [file supplementary]

## Sheet: 2020_screen
Daniel Berner & Valentin Amrhein
Why and how we should join the shift from significance testing to estimation
Screening for null hypothesis significance tests in 48 papers from the Journal of Evolutionary Biology
"Research Papers" category considered only, four from each of the 12 issues of 2020 (volume 33; the total number of Research Papers was 136)
Only empirical papers considered, pure theory or simulation papers excluded
Article numbers within an issue selected at random using sample(seq(1:N_articles), 4); if a paper was excluded (theory paper), a substitute was again drawn at random
https://onlinelibrary.wiley.com/loi/14209101/year/2020
Results are summarized below the table
issue	Article_No	Authors	Inference based on P-values	"Significance" wording for statistical results (search term: signific)	Number of significance tests in results section	Non-significant tests in results section	Proof-of-null: incorrect verbal description of non-significant tests in results section	Correct verbal description of non-significant tests in results section	Use of stars or letters or bold fond type in figures for significance (P-values not exact)	Alpha level (implicit: not specified, but apparent use of 0.05; explicit: alpha level stated)	Explicit formal statement about null hypothesis (search term: hypoth)	Explicit formal statement about alternative hypothesis (search term: hypoth)	Pre-study power analysis (search terms: power, sample size)	Post-hoc power analysis (search term: power)	Adjustment for multiple testing (paper-wide; search terms: multiple, Bonferroni, false discovery)	Comments
1	1	Godoy 2020	y	y	8	0	NA	NA	y	0.05 (explicit)	n	n	n	n	(n)
1	2	Carleial et al. 2020	y	y	118	57	2	26	n	0.05 (explicit)	n	n	n	n	n
1	8	Maldonado-Barragan & West 2020	y	y	19	4	2	2	n	0.05 (implicit)	n	n	n	n	n
1	9	Seudre et al. 2020	y	y	9	0	NA	NA	n	0.05 (implicit)	n	n	n	n	n
2	1	Greenway et al. 2020	y	y	18	6	2	2	y	0.05 (explicit)	n	n	n	n	n	"Interactions between fixed terms were nonsignificant and therefore excluded from the final model", hence more tests.
2	3	Corral-Lopez et al. 2020	y	y	24	17	9	8	n	0.05 (implicit)	n	n	n	n	n	The only screened study where "significance" was not used in the results section; but it was used in the methods section: "we performed a backward elimination procedure of nonsignificant fixed effects in the LMM", hence more tests (some reported in the Supporting Information).
2	4	Ma et al. 2020	y	y	71	34	0	11	n	0.05 (explicit)	n	n	n	n	(n)	Use of present tense "there is no significant signal"; misinterpretation "suggest these correlations to be nonsignificant" as if significance were a feature of the population.
2	8	Patlar & Ramm 2020	y	y	21	5	3	1	n	0.05 (implicit)	n	n	n	n	n	Non-significant interaction correctly interpreted and a rare case of authors actually comparing effect sizes for making a claim of "did not differ".
3	4	Baur et al. 2020	y	y	118	82	1	2	y	0.05 (explicit)	n	n	n	n	n	Many more tests performed but not reported, or just mentioned as summary statement ("all P < 0.01").
3	5	Hudson et al. 2020	y	y	44	8	0	0	n	0.05 (implicit)	n	n	n	n	n
3	6	Garamszegi et al. 2020	(y)	y	0	NA	NA	NA	NA	0.05 (implicit)	n	n	n	n	n	Inference mostly based on Cis (just one P-value given in methods section), but "significance" wording used, probably based on overlap of zero (not made explicit).
3	7	Diamantidis et al. 2020	y	y	125	74	0	12	y	0.05 (implicit)	n	n	n	n	n
4	3	Fisher et al. 2020	(y)	y	9	6	5	1	n	0.05 (implicit)	n	n	n	n	n	Most inference based on Cis (with emphasis on overlap of zero).
4	4	Wright et al. 2020	y	y	156	115	15	8	y	0.05 (explicit)	n	n	n	n	(n)	Apparently there were many more tests performed.
4	9	Martin et al. 2020	y	y	20	5	0	1	n	0.05 (explicit)	n	n	n	y	n	More analyses in the Supporting Information. The power analysis was explicitly performed after the study was designed (it was requested by reviewers) and hence is based on observed parameter estimates.
4	10	Huang et al. 2020	y	y	5	1	0	1	n	0.05 (explicit)	n	n	n	n	n
5	1	Gobbin et al. 2020	y	y	390	208	9	2	y	0.05 (implicit)	n	n	n	n	(n)	More tests presented in the Supporting Information.
5	6	Keais et al. 2020	y	y	14	9	1	5	y	0.05 (implicit)	n	n	n	n	n
5	12	Vaught et al. 2020	y	y	16	12	0	3	n	0.05 (explicit)	n	n	n	n	(n)
5	13	Weber et al. 2020	y	y	22	17	2	0	n	0.05 (implicit)	n	n	n	n	n
6	1	Abbott et al. 2020	y	y	51	19	2	3	n	0.05 (implicit)	n	n	n	n	(n)	Many more P-values generated in main analysis, but not reported (some mentioned in statements like "main effects were significant"); plus a large test screen of 6286 genes, involving P-values and significance.
6	6	Hadlow et al. 2020	y	y	62	51	1	4	n	0.05 (explicit)	n	n	n	n	n	Proof-of-the-null: "Individual estimates were also uncorrelated ... (r = .258; p = .472)".
6	7	Davesne et al. 2020	y	y	77	28	0	1	n	0.05 (implicit)	n	n	n	n	n
6	8	Rohner 2020	y	y	16	0	0	0	n	0.05 (implicit)	n	n	n	n	n
7	1	Palacio et al. 2020	y	y	21	7	0	1	y	0.05 (explicit)	n	n	n	n	n
7	4	Hasegawa & Arai 2020	y	y	62	12	0	3	n	0.05 (explicit)	n	n	n	n	n
7	5	Günter et al. 2020	y	y	183	106	0	3	y	0.05 (implicit)	n	n	n	n	(n)	Table 1 with 102 tests presents only stars but no other information. More tests were conducted, some presented in the Supporting Information.
7	6	Fricke et al. 2020	y	y	50	7	6	2	y	0.05 (explicit)	n	n	n	n	(n)	More tests conducted for model simplification etc, presented in the Supporting Information.
8	1	Chu et al. 2020	y	y	16	11	0	4	n	0.05 (implicit)	n	n	n	n	n	Many more tests in the Supporting Information.
8	3	Wen & Simons 2020	y	y	72	27	2	3	y	0.05 (explicit)	n	n	n	n	(n)
8	5	Gibson Vega et al. 2020	y	y	40	23	0	3	n	0.05 (implicit)	n	n	n	n	n
8	7	Sultanova et al. 2020	y	y	32	16	0	6	n	0.05 (implicit)	n	n	n	n	(n)	More tests in the Supporting Information.
9	4	Cronin et al. 2020	y	y	4	2	1	0	n	0.05 (implicit)	n	n	n	n	n	Proof-of-the-null: "no such relationship (r = −.41, p = .1691".
9	9	Sathe & Kümmerli 2020	y	y	109	39	5	0	y	0.05 (implicit)	n	n	n	n	n	More tests in Supporting Information
9	13	Cardozo et al. 2020	y	y	11	2	1	0	n	0.05 (explicit)	n	n	n	n	n
9	14	Kappers et al. 2020	y	y	15	3	0	0	n	0.05 (implicit)	n	n	n	n	n	Many more tests presented in the Supporting Information.
10	1	Broder et al. 2020	y	y	11	5	1	2	n	0.05 (explicit)	n	n	n	n	n	Careful wording: "The slope for Intro2 in response to the food treatment visually appears to differ, but it is not significant"
10	2	Powell et al. 2020	y	y	38	4	2	2	n	0.05 (explicit)	n	n	n	n	n	p = 1.07e−57: that's about as likely as picking one atom from our solar system randomly! More tests in the Supporting Information.
10	6	Plesnar-Bielak et al. 2020	y	y	12	2	2	0	n	0.05 (implicit)	n	n	n	n	n
10	10	Katoh et al. 2020	y	y	17	6	0	4	n	0.05 (explicit)	n	n	n	n	(n)
11	3	Carballo et al. 2020	y	y	65	24	0	0	n	0.05 (implicit)	n	n	n	n	n	In section 3.3, results are not given because not significant, but many more tests in the Supporting Information.
11	4	Zurowski et al. 2020	y	y	27	17	3	1	n	0.05 (explicit)	n	n	n	n	(n)
11	8	Archer et al. 2020	y	y	13	12	12	0	n	0.05 (implicit)	n	n	n	n	n
11	11	Plaza et al. 2020	(y)	y	21	11	0	2	n	0.05 (explicit)	y	n	n	n	n	Inference based on 95% CI overlap with zero, hence NHST. The only study justfying a null hypothesis: "the network structure by itself might—by chance—produce a background level of repeatability given the structure of the data, which needs to be considered the null hypothesis for statistical testing instead of a repeatability of zero as normally done when using independent data".
12	2	Stangberg et al. 2020	y	y	25	7	1	3	n	0.05 (implicit)	n	n	n	n	n	Some P-values not reported, but summurized as "all p > 0.05".
12	6	Bladon et al. 2020	y	y	30	25	1	5	n	0.05 (explicit)	n	n	n	n	n	Stepwise model reduction until only significant terms remain, hence more testing in the background.
12	7	Cooper et al. 2020	y	y	58	40	3	8	n	0.05 (explicit)	n	n	n	n	n	More tests in the Supporting Information. "Cuckolded social father ID was not included as a random effect for male recruitment as there was inadequate statistical power to estimate this term" – there is no "power" needed for estimation!
12	8	Munoz et al. 2020	y	y	21	10	0	1	n	0.05 (implicit)	n	n	n	n	n
Summary:
Articles using null hypothesis significance testing (P-values or checking whether CIs include zero):
48 (100%)
Articles using "significance" or "(non)significant" for describing statistical resutls:
48 (100%)
Range for the number of significance tests in results section:
0-390
Median number of significance tests in results section:
23
Mean number of significance tests in results section:
49.2917
Mean number of non-significant tests in results section:
25.0213
Articles using stars or letters or bold fond type in figures for significance (p-values not exact):
12 (25%)
Articles explicitly specifying alpha:
22 (46%)
Articles with explicit formal statement about which null hypothesis was tested:
1 (2%)
Articles with explicit formal statement about which alternative hypothesis was tested:
0 (0%)
Articles with pre-study power analysis:
0 (0%)
Articles with post-hoc power analysis:
1 (2%)
Articles with adjustment for multiple testing across all performed tests:
0 (0%)
From 41 papers, in which in the results section non-significant results were verbally discribed, 26 (63%) used at least partly wrong wording, and 35 (85%) used at least partly correct wording.
"Wrong wording" means that non-significance was interpreted as showing the absence of an effect, also called a "proof of the null hypothesis".
Examples for correct wording (no proof-of-the-null): no significant difference; no difference / effect was found; there was no evidence of / no support for ...
Examples for wrong wording (proofs-of-the-null): if based only on the P-value (and not, e.g., on the values covered by the CI): there was no difference / no effect; did not affect. Also: no difference was observed; patterns are "the same".
